# Supplementary material for: A freeze–thaw PVA hydrogel loaded with guava leaf extract: physical and antibacterial properties
Source: Royal Society of Chemistry journal article supplement (doi:10.1039/d1ra04092h), 2021-01-01
Supplement: d1ra04092h1.pdf [file d1ra04092h1.pdf]

Supplementary Info

Table S1†. Pore size distribution of PVA/GLE hydrogel for each group

| n  | Pore Size Distribution ( $\mu\text{m}$ ) |        |        |        |        |         |
|----|------------------------------------------|--------|--------|--------|--------|---------|
|    | PGL0                                     | PGL1   | PGL2   | PGL3   | PGL4   | PGL5    |
| 1  | 17.043                                   | 27.924 | 32.223 | 42.485 | 49.758 | 74.411  |
| 2  | 16.04                                    | 20.529 | 36.215 | 57.611 | 37.985 | 118.273 |
| 3  | 24.081                                   | 20.901 | 17.993 | 57.611 | 51.415 | 64.362  |
| 4  | 18.052                                   | 21.201 | 27.775 | 51.826 | 42.663 | 63.955  |
| 5  | 28.142                                   | 18.654 | 34.833 | 30.74  | 82.962 | 51.522  |
| 6  | 22.061                                   | 18.701 | 41.351 | 33.767 | 71.86  | 89.006  |
| 7  | 22.055                                   | 18.963 | 50.155 | 39.373 | 49.081 | 77.092  |
| 8  | 19.074                                   | 21.748 | 23.168 | 44.589 | 47.27  | 74.035  |
| 9  | 21.059                                   | 22.076 | 16.786 | 43.681 | 50.581 | 70.308  |
| 10 | 24.065                                   | 21.753 | 24.69  | 40.629 | 43.776 | 90.006  |
| 11 | 16.662                                   | 19.188 | 30.856 | 33.793 | 57.604 | 124.825 |
| 12 | 20.181                                   | 28.113 | 62.335 | 40.71  | 54.812 | 80.183  |
| 13 | 18.218                                   | 20.913 | 46.559 | 36.229 | 58.434 | 58.249  |
| 14 | 15.851                                   | 21.584 | 50.784 | 40.601 | 66.18  | 53.106  |
| 15 | 13.9                                     | 23.36  | 57.336 | 38.174 | 51.413 | 47.321  |
| 16 | 15.335                                   | 18.654 | 43.822 | 38.108 | 45.753 | 41.608  |
| 17 | 16.842                                   | 20.232 | 26.598 | 45.757 | 54.921 | 34.033  |
| 18 | 16.366                                   | 22.501 | 29.433 | 37.258 | 67.223 | 54.829  |
| 19 | 16.662                                   | 30.384 | 54.489 | 47.118 | 56.31  | 60.166  |
| 20 | 16.32                                    | 27.061 | 56.624 | 28.377 | 64.039 | 47.901  |
| 21 | 12.541                                   | 20.213 | 39.177 | 46.885 | 64.529 | 44.637  |
| 22 | 19.962                                   | 23.831 | 44.56  | 51.833 | 47.388 | 56.403  |
| 23 | 16.85                                    | 27.597 | 39.177 | 53.019 | 40.229 | 38.082  |
| 24 | 15.732                                   | 28.871 | 45.264 | 41.434 | 49.758 | 35.004  |
| 25 | 14.354                                   | 27.642 | 49.413 | 47.142 | 46.451 | 34.442  |
| 26 | 17.601                                   | 21.608 | 41.546 | 47.142 | 53.382 |         |
| 27 | 13.927                                   | 24.204 | 33.075 | 41.504 | 86.484 |         |
| 28 | 14.844                                   | 23.655 | 31.784 | 39.981 | 63.773 |         |
| 29 | 16.32                                    | 29.919 | 31.721 | 35.884 | 48.574 |         |
| 30 | 19.465                                   | 48.023 | 37.84  | 25.677 | 73.656 |         |
| 31 | 17.537                                   | 34.204 |        |        |        |         |
| 32 | 25.877                                   | 35.872 |        |        |        |         |
| 33 | 22.265                                   | 32.176 |        |        |        |         |
| 34 | 24.567                                   | 17.823 |        |        |        |         |
| 35 | 23.708                                   | 21.201 |        |        |        |         |
| 36 | 25.959                                   | 23.495 |        |        |        |         |
| 37 | 18.654                                   | 22.618 |        |        |        |         |
| 38 | 18.654                                   | 31.078 |        |        |        |         |
| 39 | 18.546                                   | 16.407 |        |        |        |         |
| 40 | 30.593                                   | 26.935 |        |        |        |         |

|                       |              |              |              |              |              |              |
|-----------------------|--------------|--------------|--------------|--------------|--------------|--------------|
| 41                    | 45.823       | 25.633       |              |              |              |              |
| 42                    | 20.939       | 19.623       |              |              |              |              |
| 43                    | 19.83        | 21.614       |              |              |              |              |
| 44                    | 17.658       | 37.189       |              |              |              |              |
| 45                    | 23.345       | 36.542       |              |              |              |              |
| 46                    | 30.985       | 39.343       |              |              |              |              |
| 47                    | 20.206       | 31.979       |              |              |              |              |
| 48                    | 20.206       | 27.061       |              |              |              |              |
| 49                    | 25.544       | 21.742       |              |              |              |              |
| 50                    | 17.891       | 26.232       |              |              |              |              |
| <b>d<sub>av</sub></b> | <b>20.17</b> | <b>25.37</b> | <b>38.58</b> | <b>41.96</b> | <b>55.94</b> | <b>63.35</b> |
| <b>STDev</b>          | <b>5.62</b>  | <b>6.44</b>  | <b>11.74</b> | <b>7.84</b>  | <b>11.98</b> | <b>23.96</b> |

Table S2†. Tukey's HSD statistical test for significant differences in pore size between groups using IBM SPSS 20.

Tukey HSD<sup>a,b</sup>

| GLE Concentration | N  | Subset for alpha = 0.05 |         |         |
|-------------------|----|-------------------------|---------|---------|
|                   |    | 1                       | 2       | 3       |
| PGL0              | 50 | 20.1678                 |         |         |
| PGL1              | 50 | 25.3754                 |         |         |
| PGL2              | 30 |                         | 38.5861 |         |
| PGL3              | 30 |                         | 41.9646 |         |
| PGL4              | 30 |                         |         | 55.9421 |
| PGL5              | 25 |                         |         | 63.3504 |
| Sig.              |    | .430                    | .833    | .091    |

Means for groups in homogeneous subsets are displayed.

a. Uses Harmonic Mean Sample Size = 33.333.

b. The group sizes are unequal. The harmonic mean of the group sizes is used. Type I error levels are not guaranteed.
